# Supplementary material for: Structural Determinants of Phenotypic Diversity and Replication Rate of Human Prions
Source: PubMed Central journal article supplement (PMC4397081; doi:10.1371/journal.ppat.1004832), 2015-04-14
Supplement: ppat.1004832.s001.pdf [file ppat.1004832.s001.pdf]

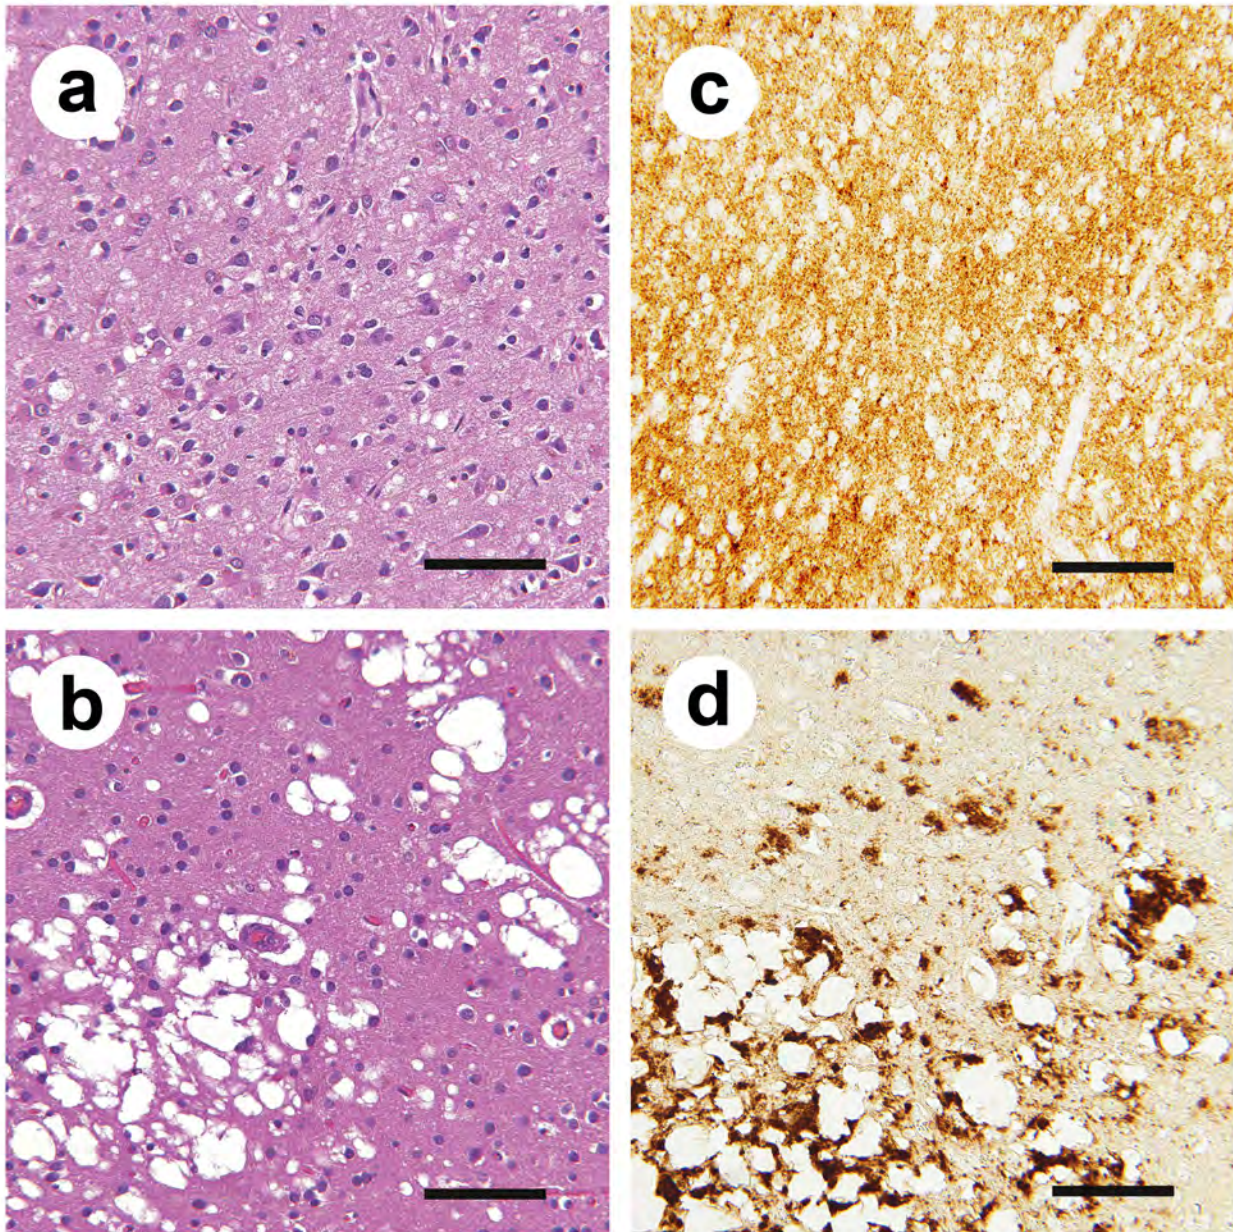

**Figure S1.** Distinct neuropathologic characteristics of the occipital neocortex in Type 1 (**a, c**) and Type 2 (**b, d**) sCJD cases homozygous for methionine in codon 129 of PRNP gene and used as a source of human prions in structural studies. (**a, b**) Spongiform degeneration. Typical fine vacuole-type spongiform changes with diffuse small round vacuoles in Type 1 (**a**) contrast with large coarse fused vacuoles in Type 2 sCJD (**b**). (**c, d**) PrP<sup>Sc</sup> deposition. Dispersed punctate (synaptic-type) PrP<sup>Sc</sup> deposition in occipital cortex of Type 1 sCJD (**c**) contrasts with large plaque-like deposits frequently associated with vacuols in Type 2 sCJD (**d**). Scale bar is 50  $\mu$ m.
